# Supplementary material for: Plasma-Catalytic CO2 Reforming of Toluene over Hydrotalcite-Derived NiFe/(Mg, Al)Ox Catalysts
Source: JACS Au. 2023 Feb 17;3(3):785–800. doi: 10.1021/jacsau.2c00603 (PMC10052232; doi:10.1021/jacsau.2c00603)
Supplement: Supplementary file 1 — au2c00603_si_001.pdf [file au2c00603_si_001.pdf]

# Plasma-catalytic CO<sub>2</sub> reforming of toluene over hydrotalcite-derived NiFe/(Mg, Al)O<sub>x</sub> catalysts

Lina Liu <sup>a</sup>, Jing Dai <sup>a</sup>, Sonali Das <sup>b,1</sup>, Yaolin Wang <sup>c</sup>, Han Yu <sup>a,\*</sup>, Shibo Xi <sup>d</sup>,

Zhikun Zhang <sup>e,\*</sup>, Xin Tu <sup>c,\*</sup>

<sup>a</sup> College of Environmental Science and Engineering, Ministry of Education Key Laboratory of Pollution Processes and Environmental Criteria, Nankai University, Tianjin 300350, China

<sup>b</sup> Department of Chemical and Biomolecular Engineering, National University of Singapore, 117585, Singapore

<sup>c</sup> Department of Electrical Engineering and Electronics, University of Liverpool, Liverpool, L69 3GJ, UK

<sup>d</sup> Institute of Chemical and Engineering Sciences, A\* STAR, 1 Pesek Road, Jurong Island, 627833, Singapore

<sup>e</sup> School of Energy and Environmental Engineering, Tianjin Key Laboratory of Clean Energy and Pollution Control, Hebei University of Technology, Tianjin 300401, China

<sup>1</sup> Present address: Department of Chemical Engineering, Indian Institute of Technology Bombay, Mumbai, 400076, India

\*Corresponding authors

### **Detailed procedures for gaseous and liquid product analysis**

The gaseous products and toluene were determined by an on-line gas chromatograph (GC, 7890A, Agilent Technologies, USA). Specifically, the permanent gaseous products, including H<sub>2</sub>, CO and CO<sub>2</sub> were analyzed using a Carboxen 1000 packed column and a TCD, while light hydrocarbons (LHCs) and toluene were measured using a DB-5 capillary column and a flame ionization detector (FID). The injection valves, ovens, and detectors were maintained at 150 °C, 80 °C and 250 °C, respectively.

The complex liquid byproducts of the plasma CRT reaction with and without the Ni<sub>4</sub>Fe<sub>1</sub>-R catalyst were collected with methanol and analyzed using gas chromatography-mass spectrometry (GC-MS, Trace1300-ISQ7000, Thermo Fisher Scientific, USA) equipped with an HP-5MS capillary column (30 m × 0.250 mm, 0.25 μm; Agilent Technologies, USA). 1 μL of sample in methanol was injected using the split sampling mode with a split ratio of 10:1. Helium was used as the carrier gas at a flow rate of 1 mL/min. The temperature of both the ion source and the transmission line remained at 280 °C. The GC oven was initially set to 50 °C for 5 min, then programmed to 200 °C at a rate of 25 °C/min and held for 5 min, and finally increased to 280 °C at a rate of 5 °C/min and held for 5 min. Chromatograms were recorded in full scan mode with a mass range between 35 and 500 amu. Finally, the peaks were identified by comparing their mass spectra to those in the NIST 11 mass spectra library.

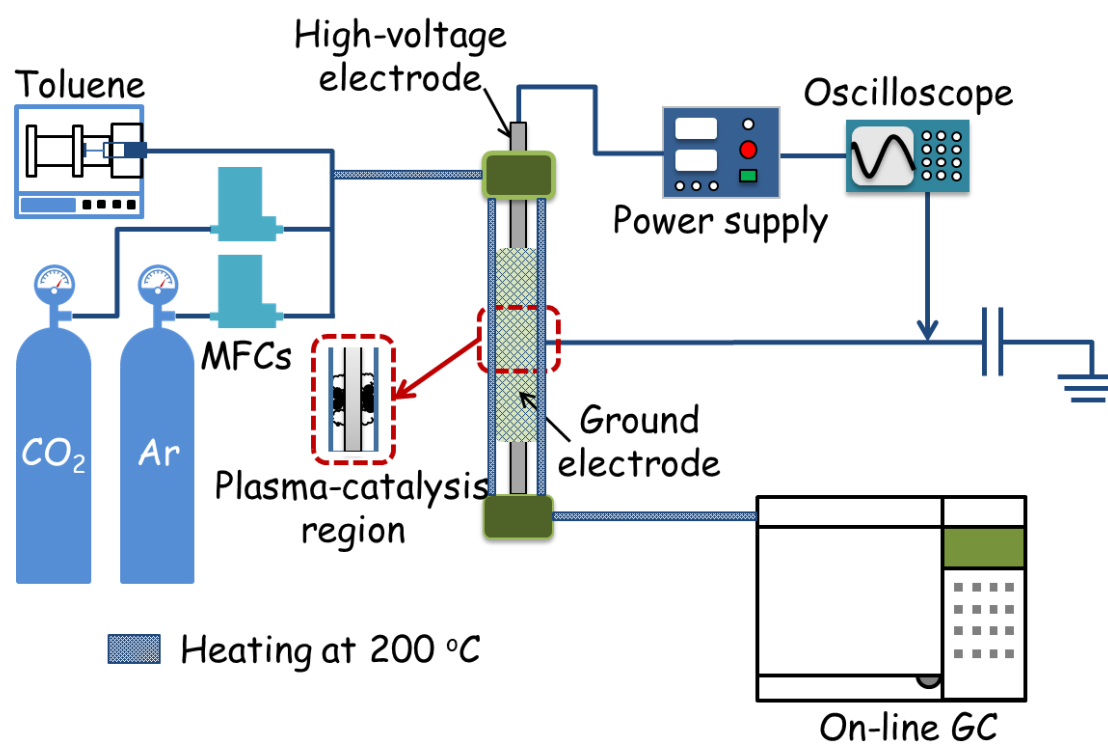

Fig. S1. Schematic diagram of the DBD plasma-catalytic system for CO<sub>2</sub> reforming of toluene

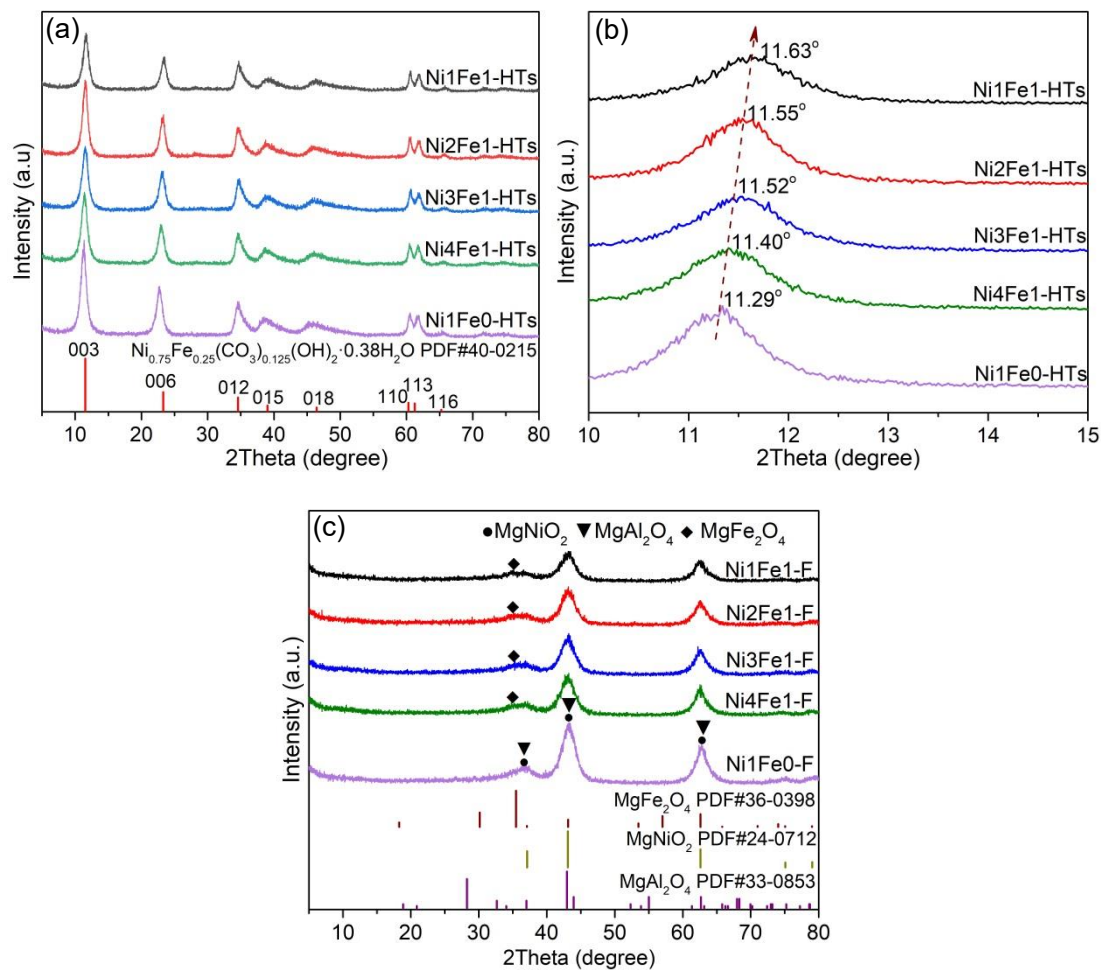

Fig. S2. XRD patterns of (a, b) as-synthesized Ni-Fe-Mg-Al LDH precursor, and (c) fresh calcined LDH-derived catalysts.

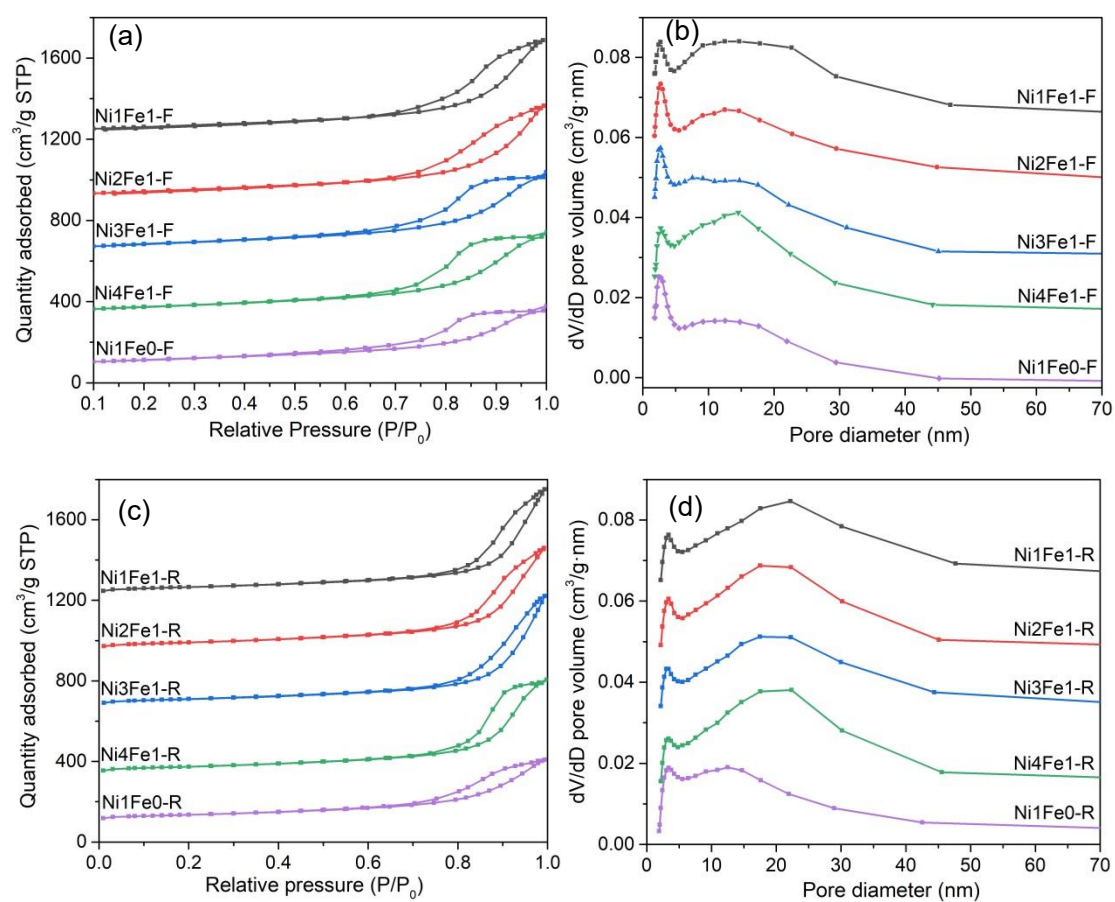

Fig. S3. N<sub>2</sub> adsorption isotherm and pore diameter distribution of (a, b) calcined and (c, d) reduced Ni-Fe/(Mg, Al)O<sub>x</sub> catalysts.

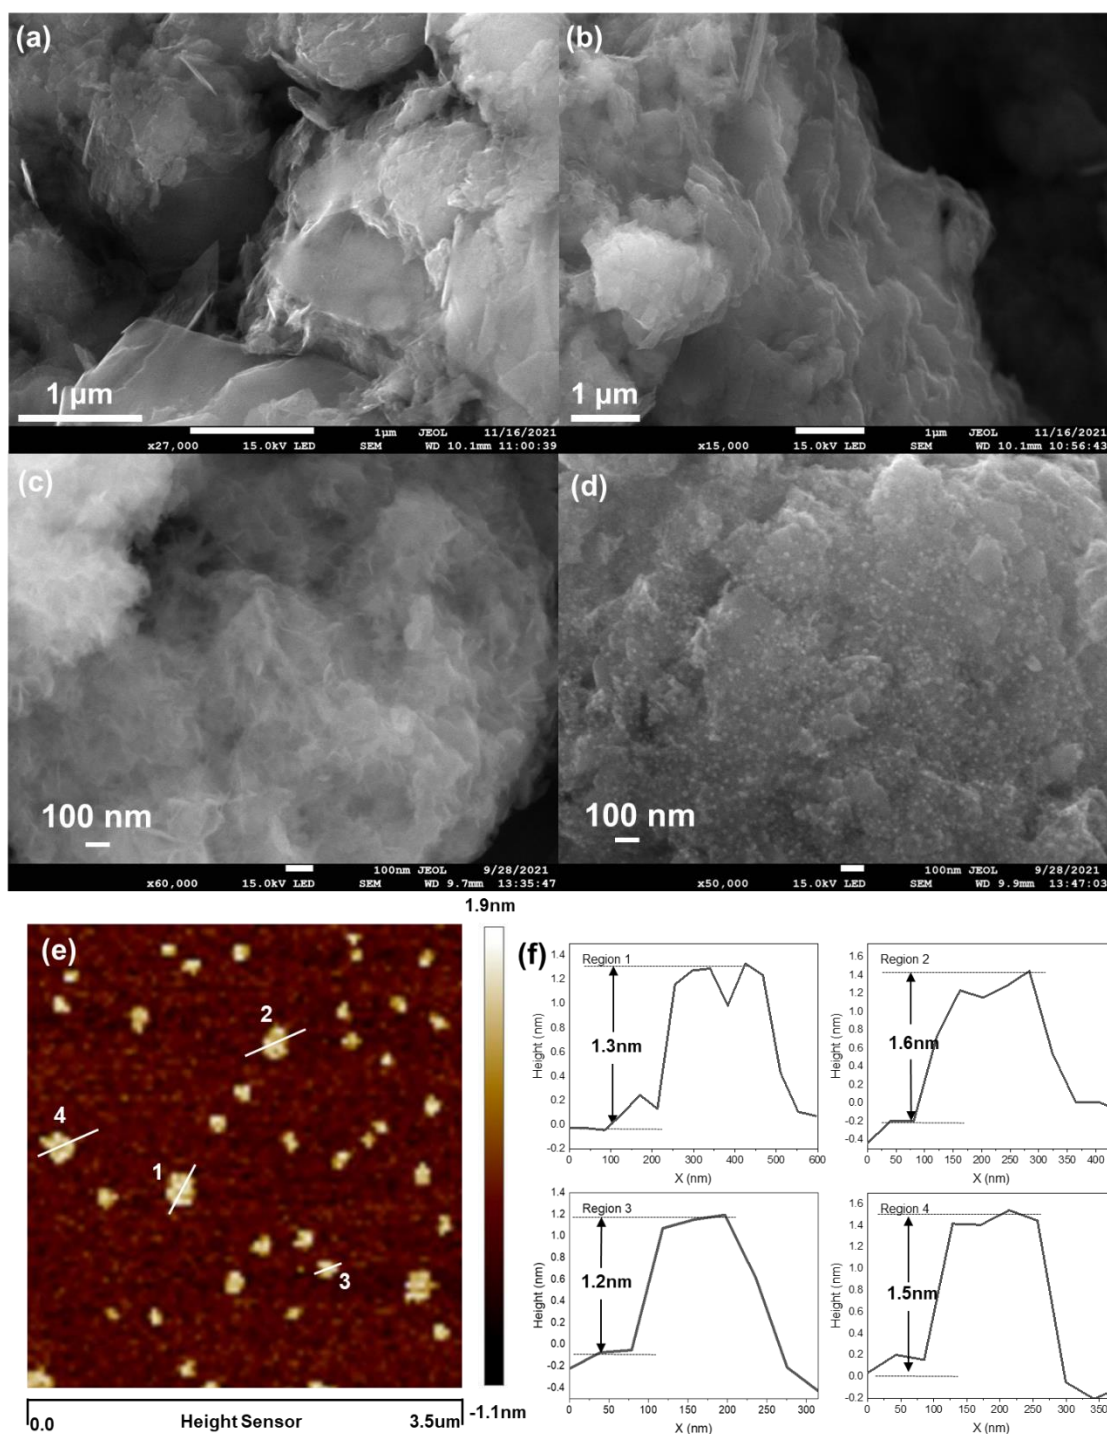

Fig. S4. FESEM images of as-synthesized (a)  $\text{Ni}_4\text{Fe}_1\text{-Mg-Al}$  and (b)  $\text{Ni-Mg-Al}$  hydrotalcite precursors, (c) calcined and (d) reduced  $\text{Ni}/(\text{Mg, Al})\text{O}_x$  catalysts, (e) AFM image and (f) the height profile of as-synthesized  $\text{Ni}_4\text{Fe}_1\text{-Mg-Al}$  hydrotalcite precursor.

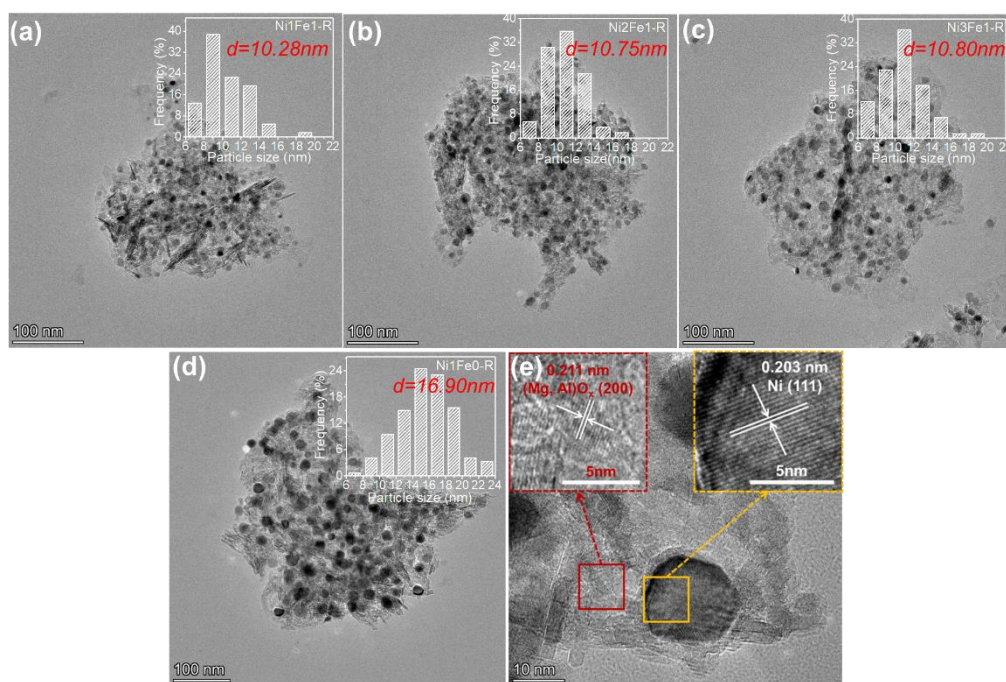

Fig. S5. (a-d) FETEM images and nanoparticle size distributions of reduced Ni-Fe/(Mg, Al)O<sub>x</sub> catalysts with different Ni/Fe ratios; and (e) magnified FETEM image and lattice fringes of reduced Ni/(Mg, Al)O<sub>x</sub> catalyst.

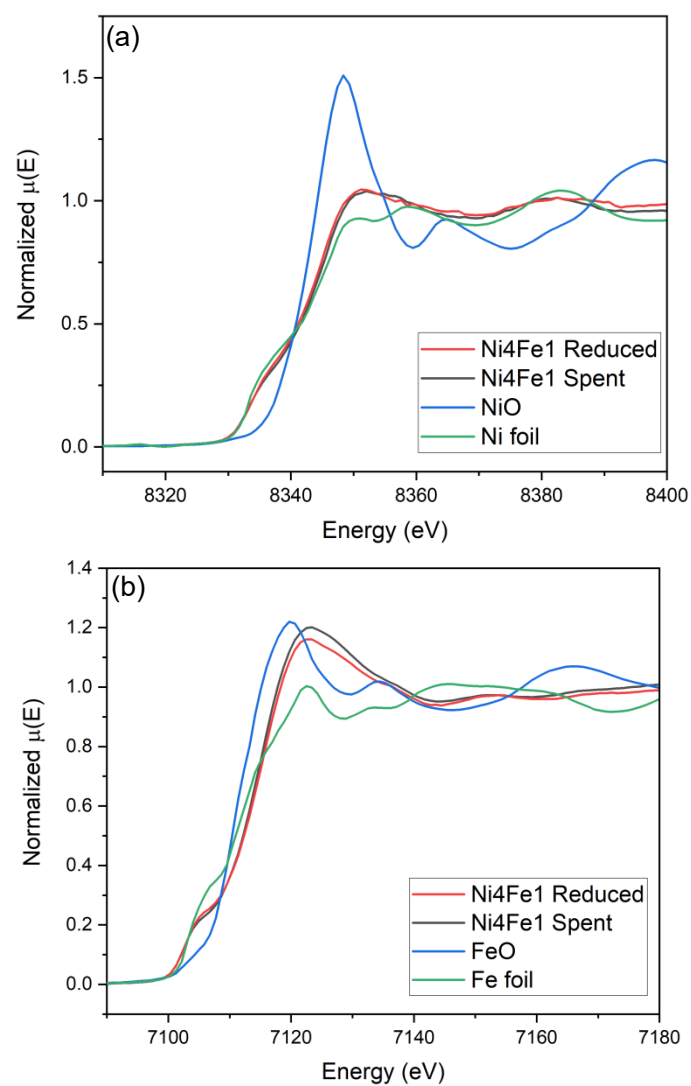

Fig. S6. (a) Ni and (b) Fe K-edge XANES spectra for reduced and spent Ni<sub>4</sub>Fe<sub>1</sub>/(Mg, Al)<sub>2</sub>O<sub>3</sub> catalysts.

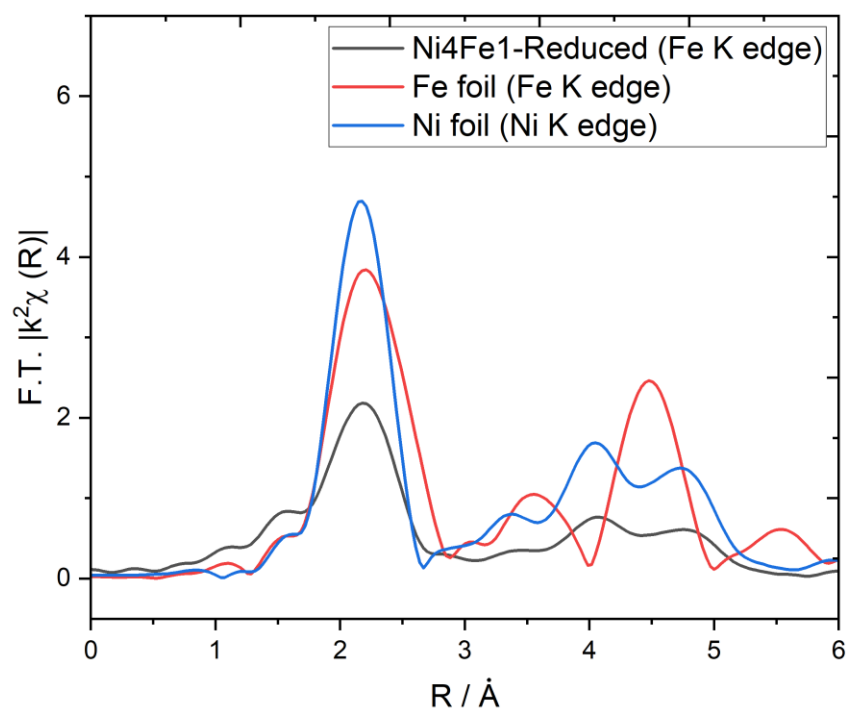

Fig. S7. Magnitude of the Fourier transform of the Fe K-edge EXAFs spectrum of the reduced Ni<sub>4</sub>Fe<sub>1</sub>/(Mg, Al)O<sub>x</sub> catalyst, and the Ni and Fe K-edge EXAFs spectra of standard Ni and Fe foils, respectively. The Fourier transform was taken over  $k = 3$ -12.

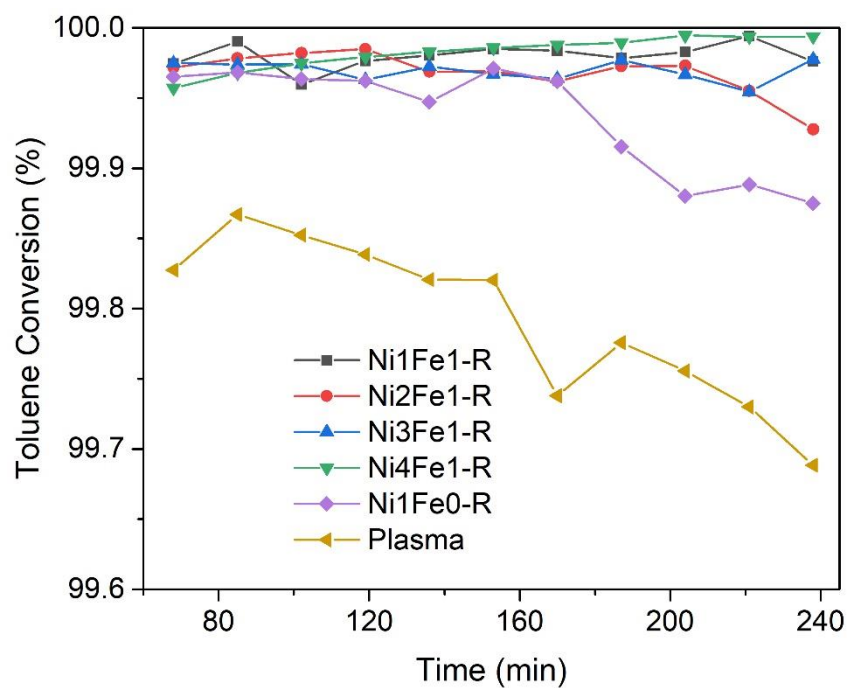

Fig. S8. Toluene conversions over reduced Ni-Fe/(Mg, Al)O<sub>x</sub> catalysts with different Ni/Fe ratios during the plasma-catalytic CRT reaction (Reaction conditions: catalyst weight 200 mg diluted with 300 mg inert SiO<sub>2</sub>, CO<sub>2</sub>/toluene/Ar 7:1:63, and discharge power 36 W).

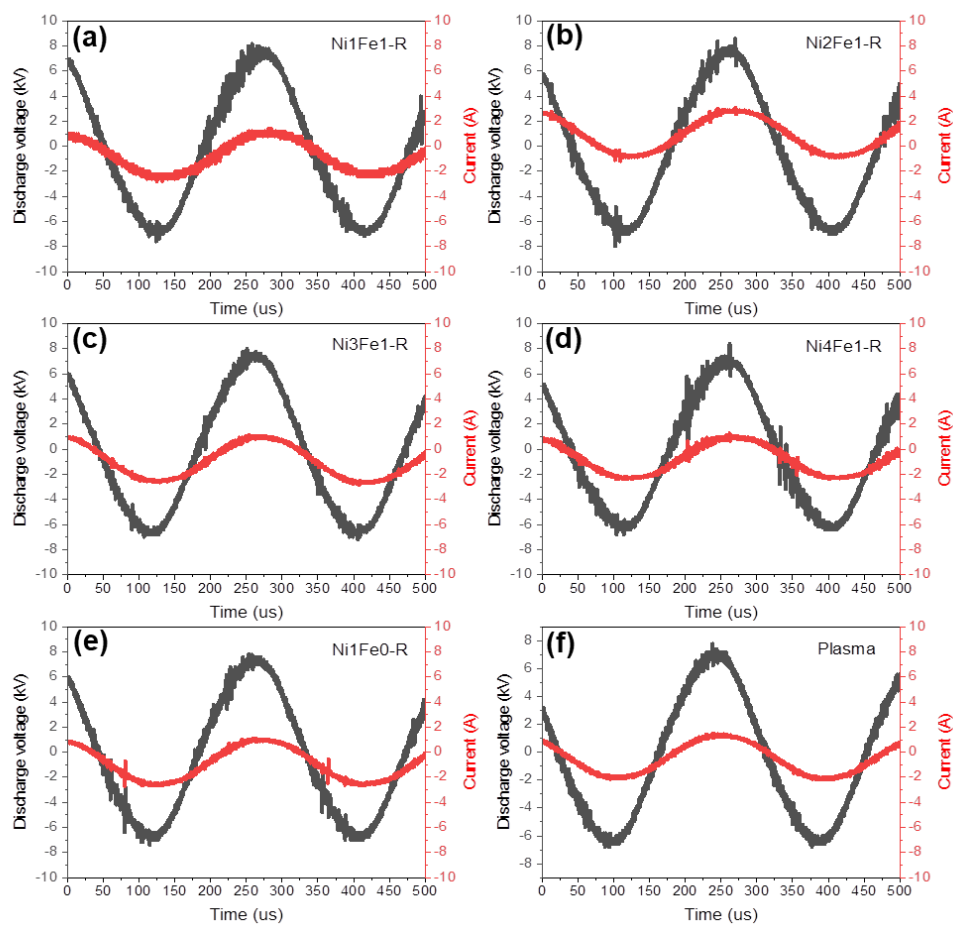

Fig. S9. Applied voltage and current signals of (a-e) DBD coupled with different Ni-Fe/(Mg, Al) $\text{O}_x$  catalysts and (f) DBD without a catalyst.

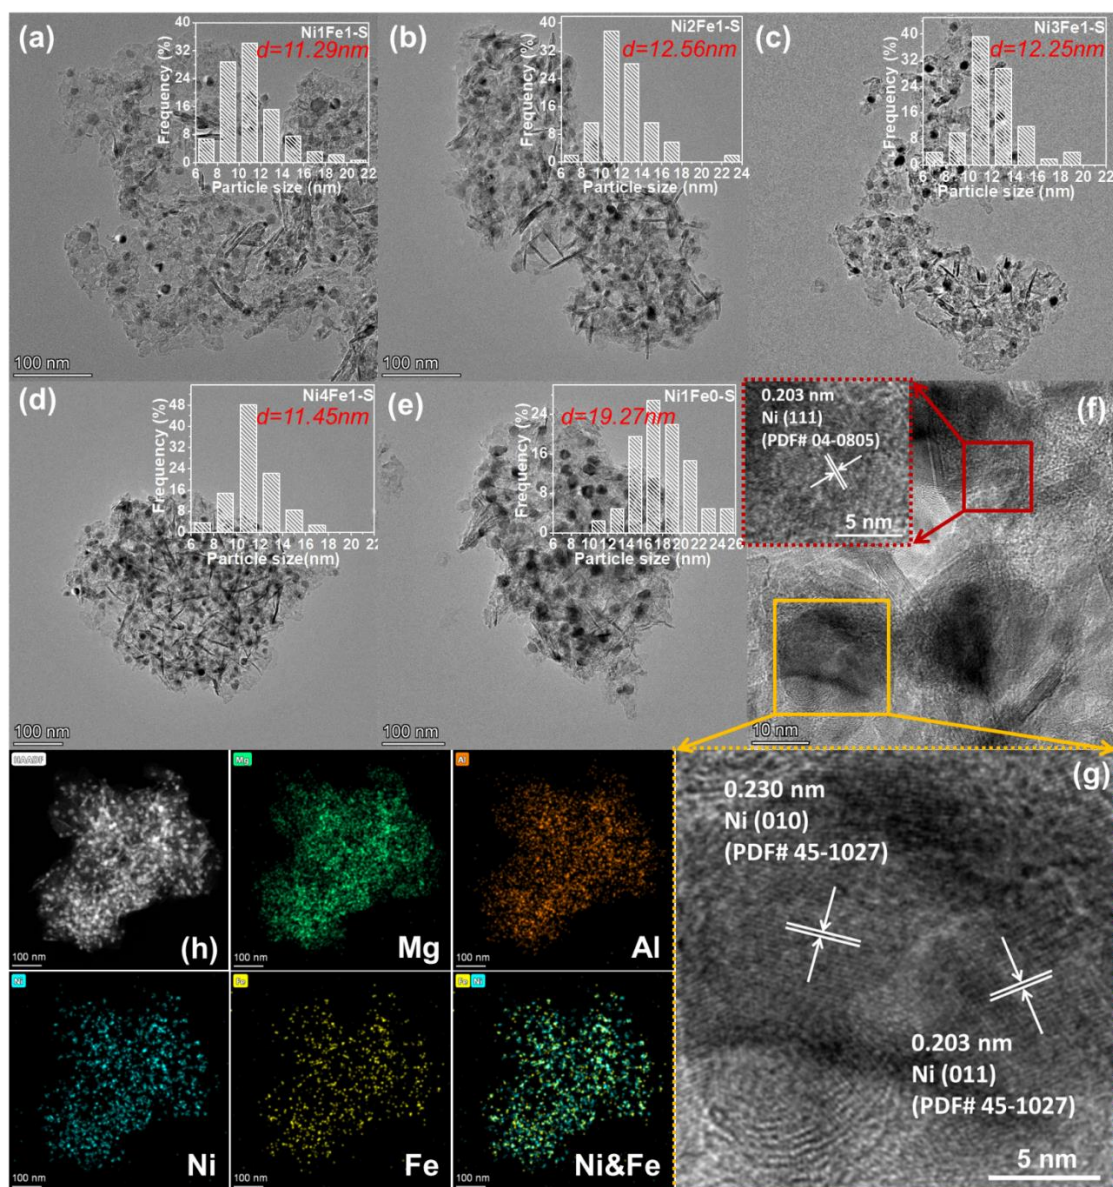

Fig. S10. FETEM images and metal particle distributions of spent (a) Ni1Fe1/(Mg, Al)O<sub>x</sub>, (b) Ni2Fe1/(Mg, Al)O<sub>x</sub>, (c) Ni3Fe1/(Mg, Al)O<sub>x</sub>, (d) Ni4Fe1/(Mg, Al)O<sub>x</sub>, and (e) Ni/(Mg, Al)O<sub>x</sub> catalysts; (f, g) magnified FETEM images and lattice fringes of spent Ni/(Mg, Al)O<sub>x</sub> catalysts; and (h) EDX-mapping images of spent Ni4Fe1/(Mg, Al)O<sub>x</sub> catalyst.

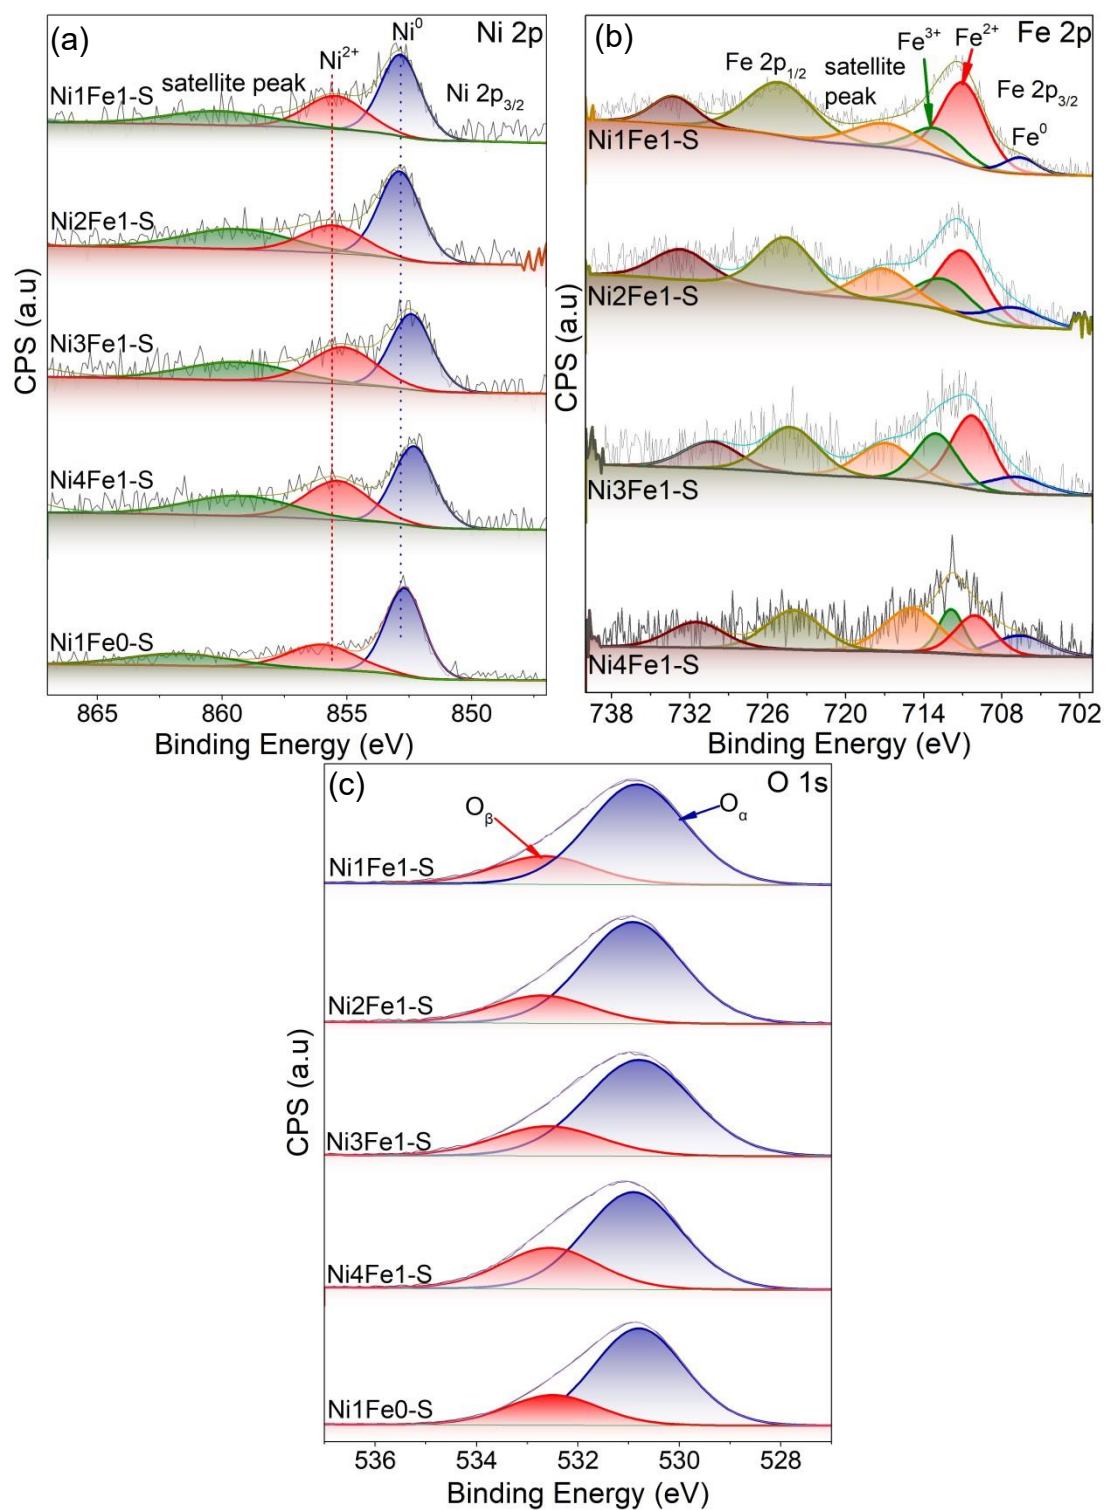

Fig. S11. (a) Ni 2p, (b) Fe 2p and (c) O 1s XPS spectra of spent Ni-Fe/(Mg, Al)O<sub>x</sub> catalysts.

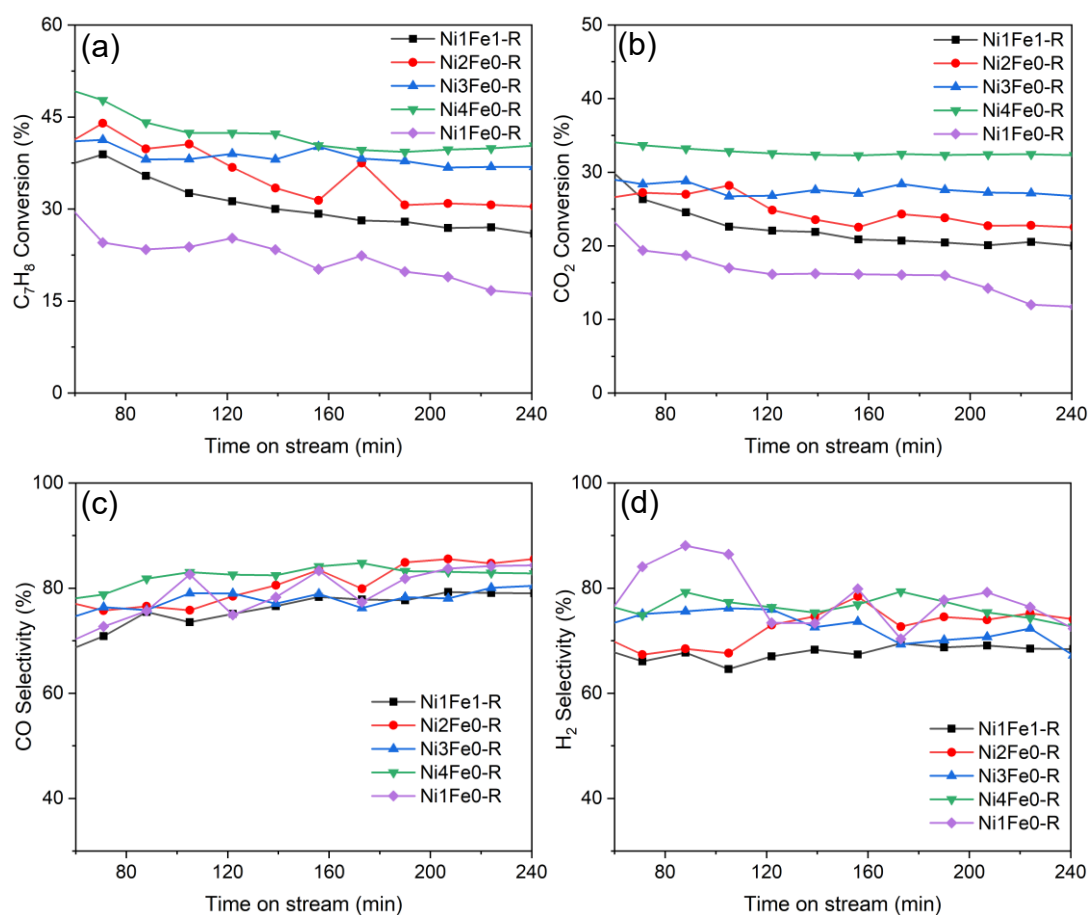

Fig. S12. Conversions of (a) toluene and (b)  $CO_2$ , and selectivity of (c) CO and (d)  $H_2$  over reduced Ni-Fe/(Mg, Al) $O_x$  catalysts with different Ni/Fe ratios during the thermal catalytic CRT reaction at 600 °C.

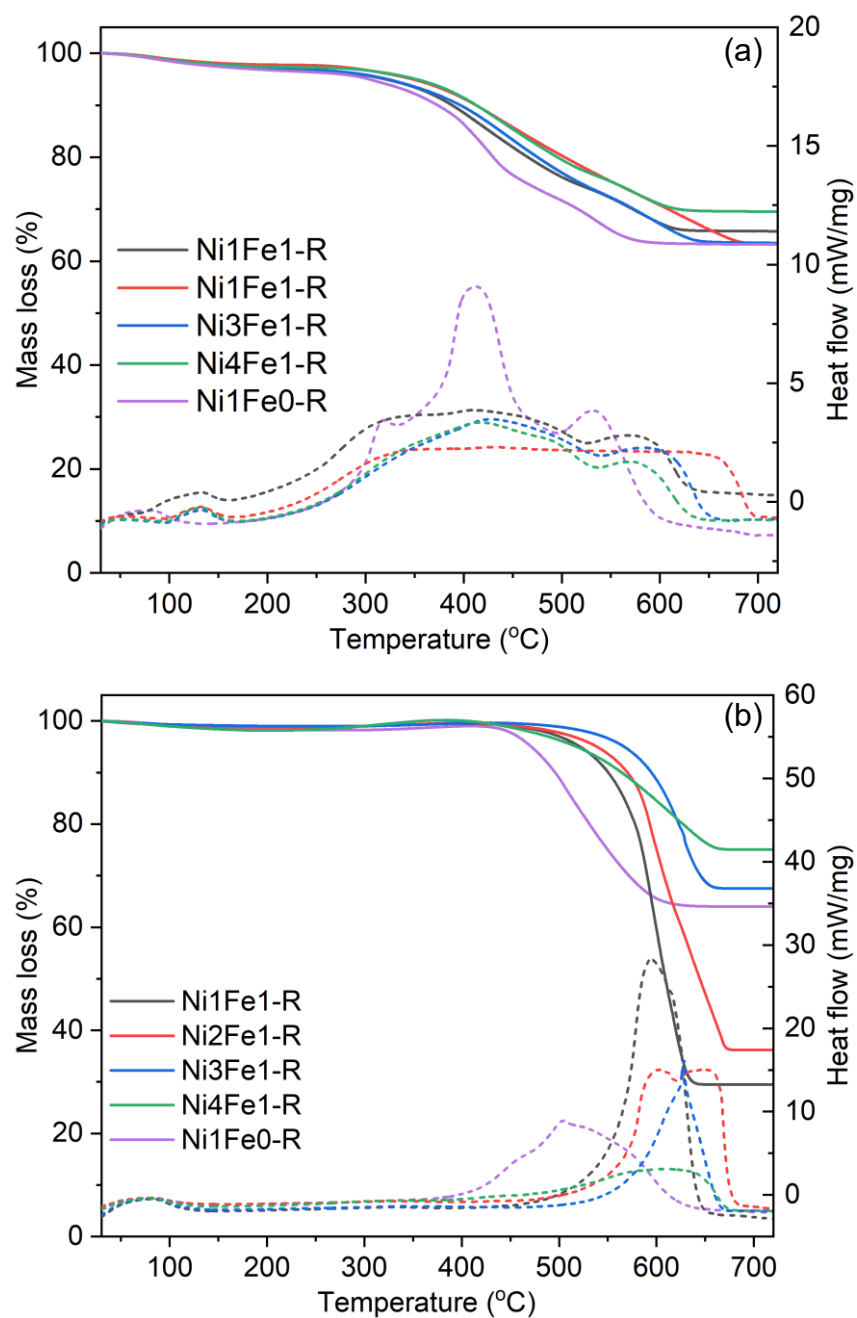

Fig. S13. TG-DSC curves of spent catalysts after (a) plasma-catalytic CRT reaction at 36 W and (b) thermal catalytic CRT reaction at 600 °C for 240 min.

## Element balance of carbon, hydrogen and oxygen

The elemental balances of carbon ( $EB_C$ ), hydrogen ( $EB_H$ ) and oxygen ( $EB_O$ ) were calculated using Eqs. (S1)-(S3), respectively, and the results are shown in **Fig. S14**. The results demonstrate that the carbon balance calculated from the production of CO, CH<sub>4</sub> and light hydrocarbons (C<sub>2</sub>-C<sub>4</sub>) was in the range of 44-52% for the plasma catalytic system, which is relatively lower than that for the thermal catalysis system due to the formation of abundant undesirable carbon-containing byproducts. As confirmed by the GC-MS and TGA results, higher hydrocarbons (e.g., benzene and p-xylene), oxygenates (maleic anhydride, benzaldehyde and benzyl alcohol) and carbon depositions are responsible for the remaining carbon output in the plasma catalytic system. H<sub>2</sub>O is an important byproduct that contributes to the element losses of hydrogen and oxygen. However, the H<sub>2</sub>O amount determined by hydrogen balance was higher than that determined by oxygen balance, as presented in **Table S7**. This phenomenon could be explained by the generation of abundant byproducts with high hydrogen contents, such as benzene, p-xylene, benzaldehyde and benzyl alcohol.

$$EB_C(\%) = \frac{\text{moles of carbon atoms in the products}}{7 \times \text{moles of toluene converted} + \text{moles of CO}_2 \text{ converted}} \quad (S1)$$

$$EB_H(\%) = \frac{\text{moles of hydrogen atoms in the products}}{8 \times \text{moles of toluene converted}} \quad (S2)$$

$$EB_O(\%) = \frac{\text{moles of oxygen atoms in CO}}{2 \times \text{moles of CO}_2 \text{ converted}} \quad (S3)$$

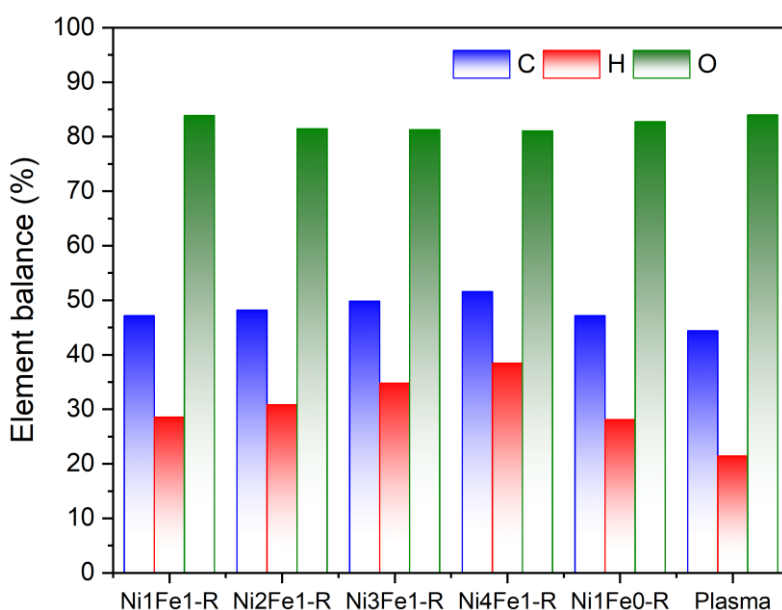

Fig. S14. Average element balance of carbon, hydrogen and oxygen during the plasma-catalytic CRT reaction (Reaction conditions: catalyst weight 200 mg diluted with 300 mg inert SiO<sub>2</sub>, CO<sub>2</sub>/toluene/Ar 7:1:63, discharge power 36 W and reaction time 240 min).

## Interaction of CO<sub>2</sub> and toluene

The effect of CO<sub>2</sub> concentration on the performance of the CRT reaction was also examined to investigate the interaction of CO<sub>2</sub> and toluene, which was crucial to understanding the mechanism of the CRT reaction in the plasma-catalytic system. **Fig. S15** shows that increasing CO<sub>2</sub> content resulted in a continuous decrease in CO<sub>2</sub> conversion but an increase in CO selectivity since the conversion of CO<sub>2</sub> to CO and O was promoted. The direct electron impact was expected to be the most dominant pathway for the dissociation of gas phase CO<sub>2</sub> (Eq. (S4)), while excited Ar\* also played an important role in CO<sub>2</sub> dissociation (Eq. (S5)) [1]. The excited Ar\* could also excite toluene by transferring its energy in collisions to form C<sub>7</sub>H<sub>8</sub>\* (Eq. (S6)), which was highly reactive and easily decomposed by collisions with an electron or other excited species such as O, as described in Eq. (S7). This reaction could explain the increased selectivity of H<sub>2</sub> as CO<sub>2</sub> content increased from 5 vol% to 15 vol% due to the formation of more reactive O species [2] (**Fig. S15(c)**). However, further increasing the CO<sub>2</sub> content to 20-30 vol.% reduced H<sub>2</sub> selectivity, which could be attributed to the enhanced reverse water-gas shift reaction, as shown in Eq. (S8) [3]. In this study, CH<sub>4</sub> might be produced by combining CH<sub>3</sub> and H (Eq. (S11)), which were generated by cracking toluene (Eqs. (S9) and (S10)).

To further elucidate the interaction of CO<sub>2</sub> and toluene, the plasma-catalytic performance of separated toluene and CO<sub>2</sub> dissociation was studied. The absence of CO<sub>2</sub> decreased H<sub>2</sub> selectivity significantly and the plasma discharge was quickly terminated by the spark discharge (**Fig. S15(c)**). Furthermore, the absence of toluene resulted in a much lower CO<sub>2</sub> conversion since the generated O species in Eq. (S4) were inefficiently consumed. However, a nearly 100% selectivity of CO was achieved due to the lack of CO-incorporated side reactions (**Fig. S16**).

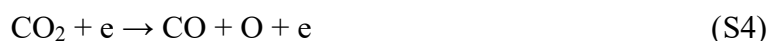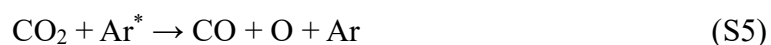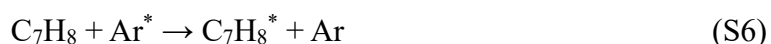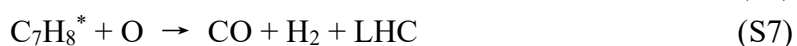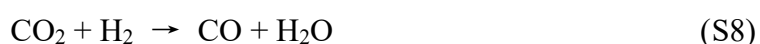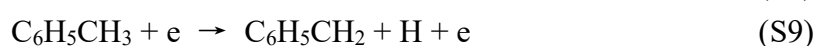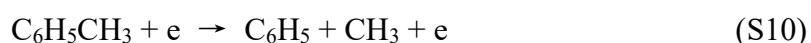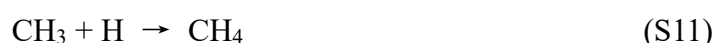

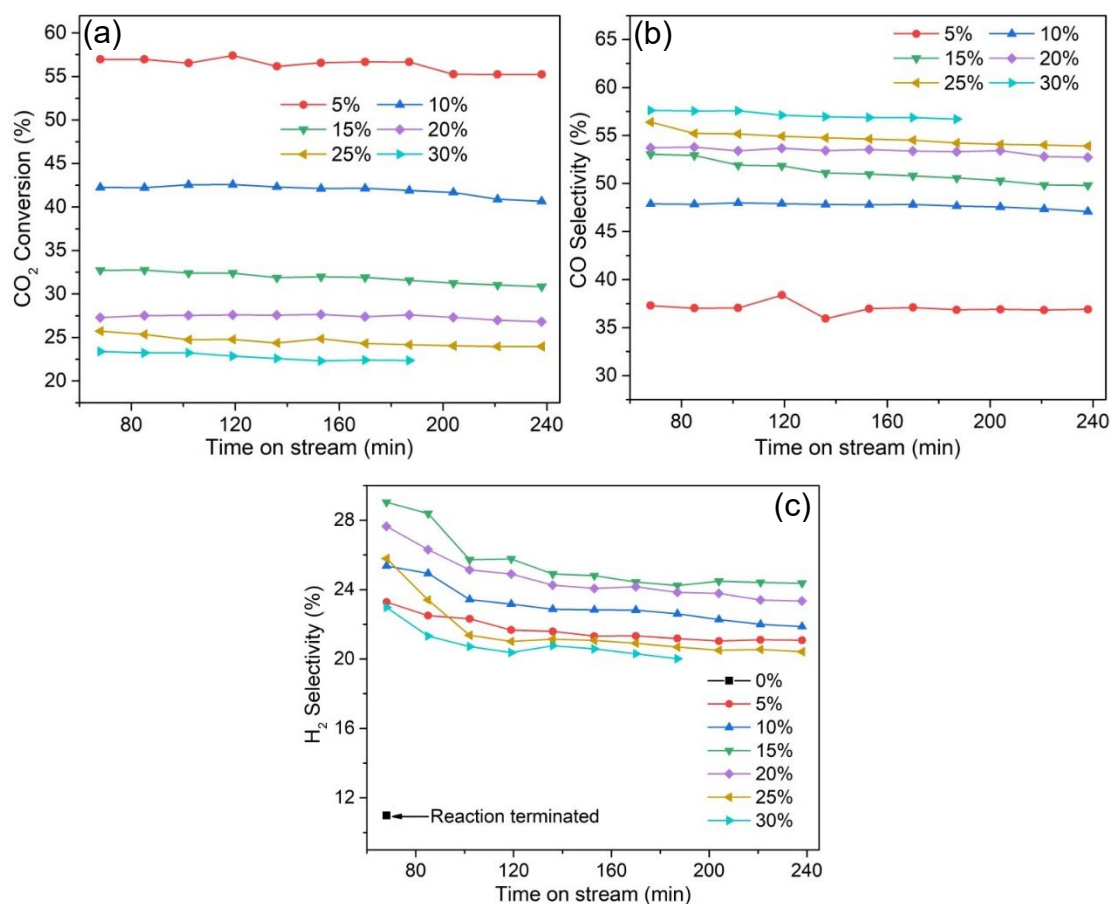

Fig. S15. Effect of CO<sub>2</sub> concentration on (a) conversion of CO<sub>2</sub>, selectivity of (b) CO and (c) H<sub>2</sub> over the Ni<sub>4</sub>Fe<sub>1</sub>-R catalyst during the plasma-catalytic CRT reaction (Reaction condition: catalyst weight 200 mg diluted with 300 mg inert SiO<sub>2</sub>, and discharge power 36 W).

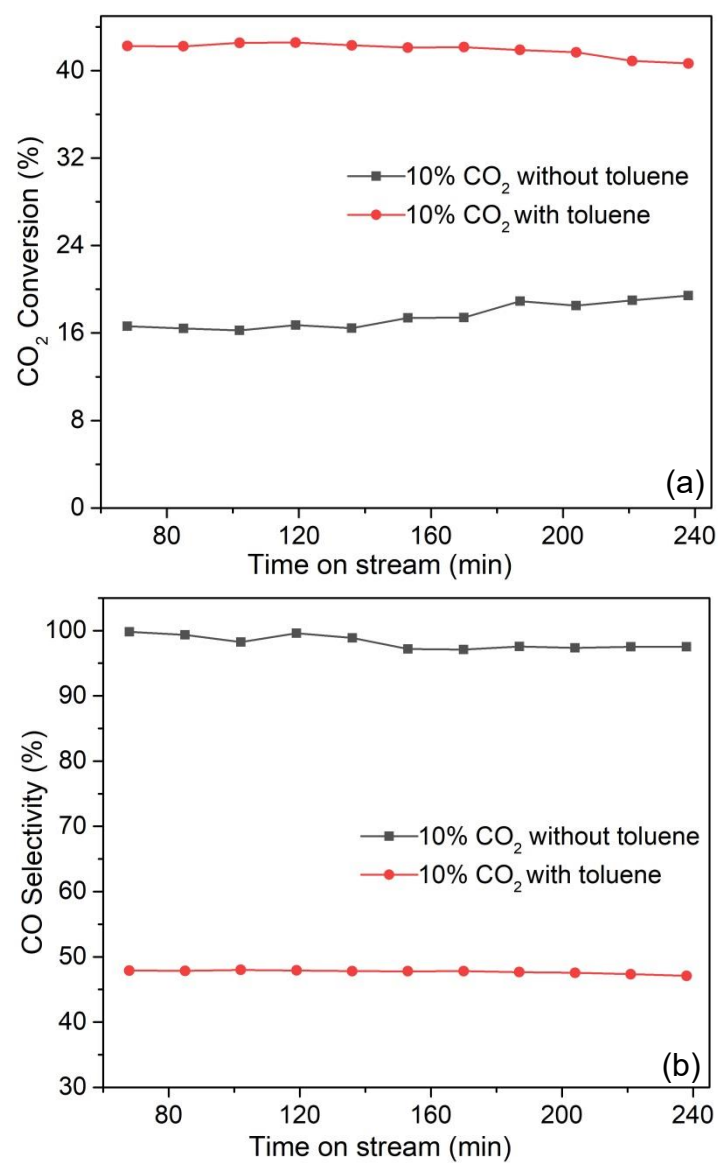

Fig. S16. (a) Conversion of CO<sub>2</sub> and (b) selectivity of CO in the plasma-catalytic system with and without toluene.

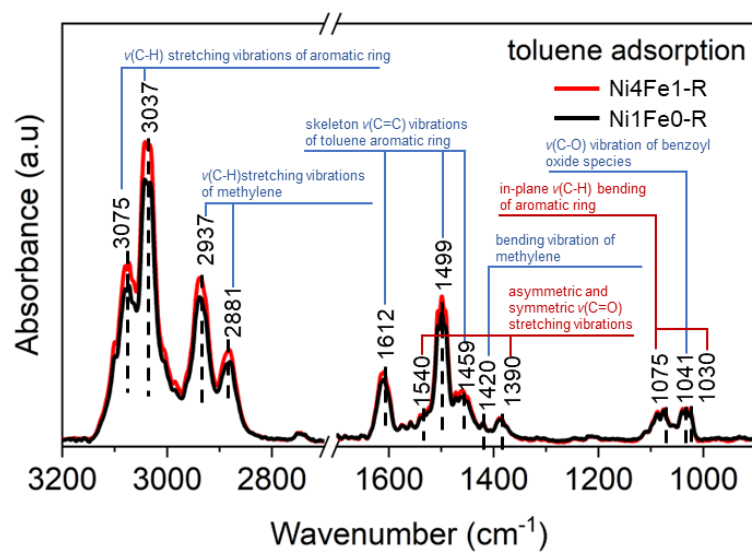

Fig. S17. FTIR spectra of toluene adsorption on the Ni4Fe1-R and Ni1Fe0-R catalysts for 30 min at 25 °C.

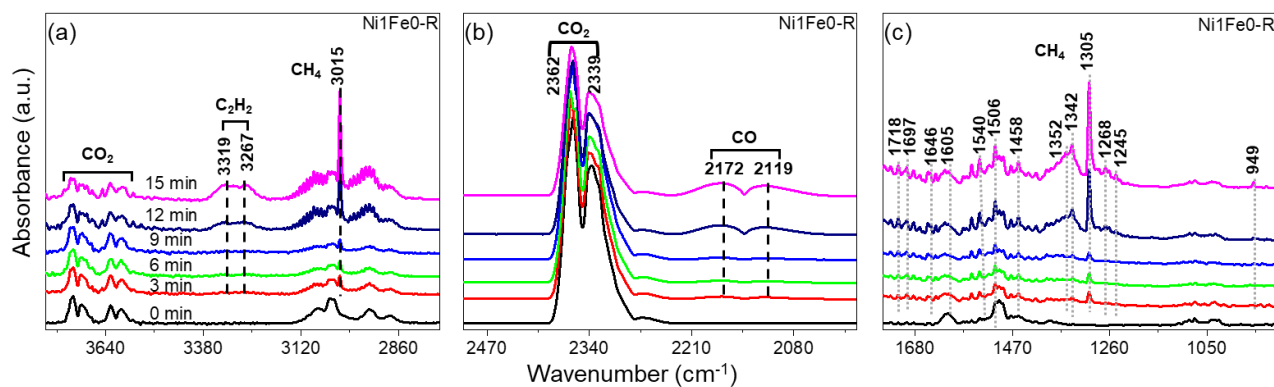

Fig. S18. *In situ* FTIR spectra of the plasma-catalytic CRT reaction over the Ni<sub>1</sub>Fe<sub>0</sub>-R catalyst at 25 °C (discharge time 15 min, feed gas 10 vol% CO<sub>2</sub>/1.5 vol% C<sub>7</sub>H<sub>8</sub> diluted in argon, total flow rate 20 ml/min).

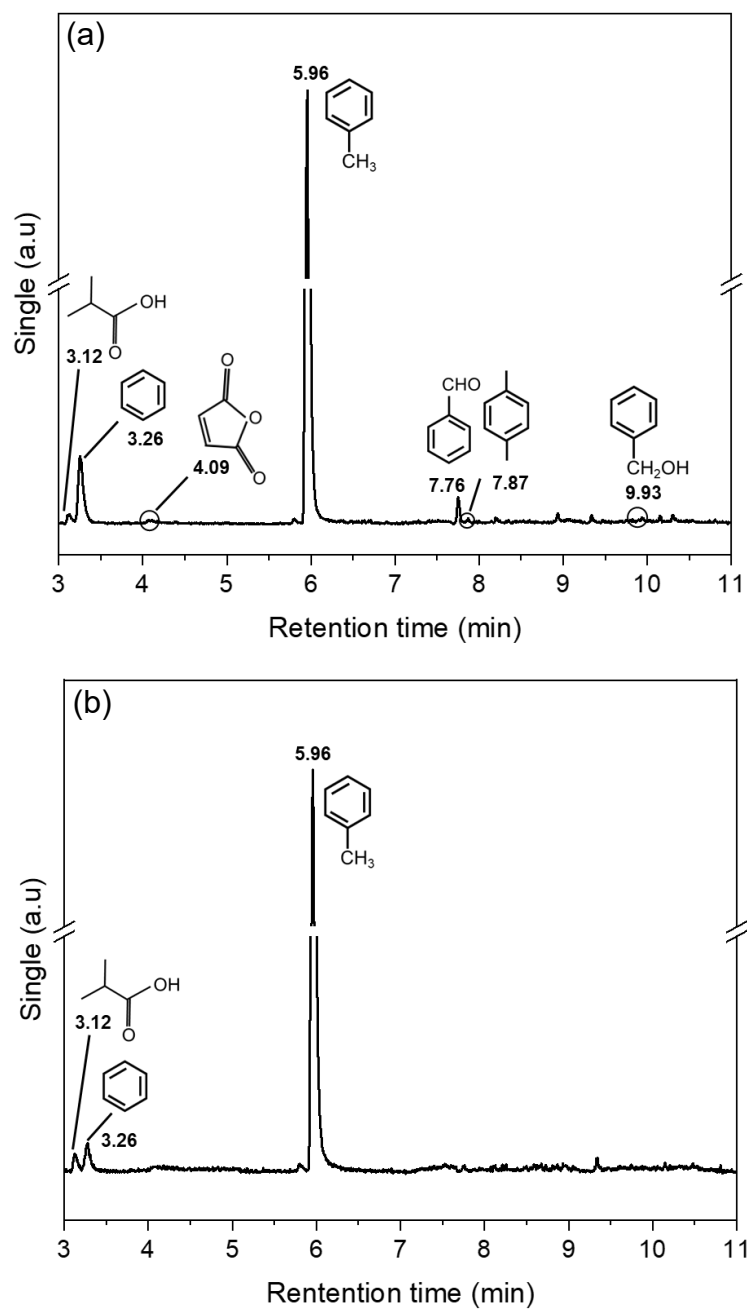

Fig. S19. GC-MS results of liquid intermediates generated in the plasma-catalytic CRT reaction over (a) Ni4Fe1-R and (b) Ni1Fe0-R catalysts.

Table S1. Chemical compositions for the preparation of hydrotalcite precursors with various Ni/Fe ratios

| Reagents                                                       | Ni         |          | Ni4Fe1     |          | Ni3Fe1     |          | Ni2Fe1     |          | Ni1Fe1     |          |
|----------------------------------------------------------------|------------|----------|------------|----------|------------|----------|------------|----------|------------|----------|
|                                                                | Mole (mol) | Mass (g) |
| Ni(NO <sub>3</sub> ) <sub>2</sub> ·6H <sub>2</sub> O           | 0.024      | 6.98     | 0.019      | 5.58     | 0.018      | 5.23     | 0.016      | 4.65     | 0.012      | 3.49     |
| Fe(NO <sub>3</sub> ) <sub>3</sub> ·9H <sub>2</sub> O           | 0          | 0        | 0.005      | 1.94     | 0.006      | 2.42     | 0.008      | 3.23     | 0.012      | 4.85     |
| Mg(NO <sub>3</sub> ) <sub>2</sub> ·6H <sub>2</sub> O           | 0.080      | 20.5     | 0.080      | 20.5     | 0.080      | 20.5     | 0.080      | 20.5     | 0.080      | 20.5     |
| Al(NO <sub>3</sub> ) <sub>3</sub> ·9H <sub>2</sub> O           | 0.032      | 12.0     | 0.032      | 12.0     | 0.032      | 12.0     | 0.032      | 12.0     | 0.032      | 12.0     |
| M <sup>2+</sup> /M <sup>3+</sup> <sup>a</sup>                  | 3.25       |          | 2.70       |          | 2.58       |          | 2.40       |          | 2.09       |          |
| M <sup>3+</sup> /M <sup>3+</sup> +M <sup>2+</sup> <sup>b</sup> | 0.24       |          | 0.27       |          | 0.28       |          | 0.29       |          | 0.32       |          |

<sup>a</sup> The molar ratio of divalent metal ions (Ni<sup>2+</sup> and Mg<sup>2+</sup>) to trivalent metal ions (Fe<sup>3+</sup> and Al<sup>3+</sup>);

<sup>b</sup> The value of M<sup>3+</sup>/M<sup>3+</sup>+M<sup>2+</sup> between 0.17 and 0.33 is favorable for achieving a complete hydrotalcite structure.

Table S2. *D*-spacing and lattice parameters of the as-synthesized Ni-Fe-Mg-Al LDH precursors determined by the XRD patterns.

| catalyst   | <i>d</i> -spacing <sup>a</sup> (nm) |                |                |                | lattice parameters <sup>b</sup> (nm) |          |
|------------|-------------------------------------|----------------|----------------|----------------|--------------------------------------|----------|
|            | <i>d</i> (003)                      | <i>d</i> (006) | <i>d</i> (012) | <i>d</i> (110) | <i>a</i>                             | <i>c</i> |
| Ni1Fe1-HTs | 0.7615                              | 0.3805         | 0.2584         | 0.1528         | 0.3056                               | 2.2845   |
| Ni2Fe1-HTs | 0.7660                              | 0.3827         | 0.2591         | 0.1528         | 0.3056                               | 2.2980   |
| Ni3Fe1-HTs | 0.7673                              | 0.3841         | 0.2583         | 0.1526         | 0.3052                               | 2.3019   |
| Ni4Fe1-HTs | 0.7570                              | 0.3869         | 0.2592         | 0.1531         | 0.3062                               | 2.2710   |
| Ni1Fe0-HTs | 0.7799                              | 0.3910         | 0.2590         | 0.1528         | 0.3056                               | 2.3397   |

<sup>a</sup> Calculated according to Bragg's law;

<sup>b</sup> Calculated by the formulas:  $a = 2 d(110)$  and  $c = 3d(003)$ .

Table S3. Actual and nominal element compositions of calcined catalysts determined by ICP-OES.

| Element | Loading (wt%)     | Ni1Fe1-F | Ni2Fe1-F | Ni3Fe1-F | Ni4Fe1-F | Ni1Fe0-F |
|---------|-------------------|----------|----------|----------|----------|----------|
| Ni      | Exp. <sup>a</sup> | 10.3     | 13.4     | 14.8     | 15.2     | 19.6     |
|         | Nom. <sup>b</sup> | 10.5     | 14.0     | 15.8     | 16.9     | 21.2     |
| Fe      | Exp.              | 9.2      | 6.7      | 5.1      | 4.1      | /        |
|         | Nom.              | 10.0     | 6.7      | 5.0      | 4.0      | /        |
| Mg      | Exp.              | 29.5     | 29.5     | 29.6     | 29.2     | 29.2     |
|         | Nom.              | 29.0     | 29.1     | 29.1     | 29.1     | 29.2     |
| Al      | Exp.              | 13.2     | 12.9     | 12.9     | 12.9     | 13.1     |
|         | Nom.              | 12.9     | 12.9     | 12.9     | 13.0     | 13.0     |
| O       | Exp.              | 37.8     | 37.5     | 37.6     | 38.6     | 38.1     |
| Ni/Fe   |                   | 1.1      | 2        | 2.9      | 3.7      | /        |

<sup>a</sup> Measured element composition by ICP-OES.

<sup>b</sup> Nominal element composition calculated by the stoichiometric ratio.

Table S4. Surface element compositions of reduced and spent Ni–Fe/(Mg, Al)O<sub>x</sub> catalysts determined by XPS spectra.

| Catalyst        | Surface nickel species |          |                  |          | Surface oxygen species |          |                 |          | Surface iron species |          |                  |          |                  |          |
|-----------------|------------------------|----------|------------------|----------|------------------------|----------|-----------------|----------|----------------------|----------|------------------|----------|------------------|----------|
|                 | Ni <sup>0</sup>        |          | Ni <sup>2+</sup> |          | Lattice oxygen         |          | Adsorbed oxygen |          | Fe <sup>0</sup>      |          | Fe <sup>2+</sup> |          | Fe <sup>3+</sup> |          |
|                 | B.E. (eV)              | Area (%) | B.E. (eV)        | Area (%) | B.E. (eV)              | Area (%) | B.E. (eV)       | Area (%) | B.E. (eV)            | Area (%) | B.E. (eV)        | Area (%) | B.E. (eV)        | Area (%) |
| <b>Ni1Fe1-R</b> | 852.5                  | 66.3     | 855.2            | 33.7     | 530.0                  | 41.7     | 531.2           | 58.3     | 706.5                | 19.1     | 709.4            | 22.8     | 711.2            | 58.1     |
| <b>Ni2Fe1-R</b> | 852.6                  | 63.4     | 855.2            | 36.6     | 530.0                  | 55.5     | 531.6           | 44.5     | 707.1                | 35.6     | 710.2            | 29.8     | 712.8            | 34.6     |
| <b>Ni3Fe1-R</b> | 852.0                  | 65.3     | 855.8            | 34.7     | 530.2                  | 63.2     | 531.9           | 36.8     | 706.8                | 38.4     | 710.0            | 28.8     | 712.2            | 32.8     |
| <b>Ni4Fe1-R</b> | 852.3                  | 60.5     | 855.5            | 39.5     | 531.1                  | 69.2     | 532.9           | 30.8     | 707.3                | 41.7     | 710.9            | 25.2     | 712.9            | 33.1     |
| <b>Ni1Fe0-R</b> | 852.8                  | 59.6     | 856.0            | 40.4     | 531.0                  | 62.9     | 532.7           | 37.1     | /                    | /        | /                | /        | /                | /        |
| <b>Ni1Fe1-S</b> | 852.8                  | 62.0     | 855.5            | 38.0     | 530.8                  | 78.1     | 532.7           | 21.9     | 706.6                | 9.7      | 710.9            | 65.2     | 713.0            | 25.0     |
| <b>Ni2Fe1-S</b> | 852.9                  | 68.2     | 855.5            | 31.2     | 530.9                  | 78.6     | 532.7           | 21.4     | 707.0                | 17.8     | 711.0            | 52.6     | 712.4            | 29.6     |
| <b>Ni3Fe1-S</b> | 852.4                  | 58.3     | 855.2            | 41.7     | 530.8                  | 76.3     | 532.5           | 23.7     | 706.9                | 15.2     | 710.3            | 50.5     | 713.0            | 34.3     |
| <b>Ni4Fe1-S</b> | 852.3                  | 57.3     | 855.4            | 42.7     | 530.9                  | 70.2     | 532.5           | 29.8     | 706.6                | 29.7     | 710.1            | 40.7     | 711.9            | 29.6     |
| <b>Ni1Fe0-S</b> | 852.8                  | 66.3     | 856.0            | 33.7     | 530.8                  | 76.3     | 532.5           | 23.7     | /                    | /        | /                | /        | /                | /        |

Table S5. EXAFS fitting parameters for the Ni<sub>4</sub>Fe<sub>1</sub>-R catalyst.

|                | Scatter                     | C.N.     | R (Å)     | $\sigma^2$ (Å <sup>2</sup> ) | E <sub>a</sub> (eV) | R-factor |
|----------------|-----------------------------|----------|-----------|------------------------------|---------------------|----------|
| <b>Ni edge</b> | Ni-O                        | 1.3±1.4  | 2.08±0.01 | 0.0074±0.0170                | 10.4±8.8            | 0.004    |
|                | Ni-Ni (Fe) -1 <sup>st</sup> | 6.1±1.4  | 2.49±0.01 | 0.0064±0.0016                | 6.0±2.6             |          |
|                | Ni-Ni (Fe) -2 <sup>nd</sup> | 3.5 ±0.7 | 3.45±0.03 | 0.0098±0.0035                |                     |          |
| <b>Fe edge</b> | Fe-O                        | 2.8±1.5  | 2.08±0.06 | 0.0105±0.0112                | 5.63±4.59           | 0.009    |
|                | Fe-Fe (Ni)                  | 6.9±1.4  | 2.52±0.01 | 0.0061±0.0014                | -2.53±2.01          |          |

Table S6. EXAFS fitting parameters for the Ni<sub>4</sub>Fe<sub>1</sub>-S catalyst.

|                | Scatter                     | C.N.     | R (Å)     | $\sigma^2$ (Å <sup>2</sup> ) | E <sub>a</sub> (eV) | R-factor |
|----------------|-----------------------------|----------|-----------|------------------------------|---------------------|----------|
| <b>Ni edge</b> | Ni-Ni (Fe) -1 <sup>st</sup> | 8.4 ±0.9 | 2.49±0.01 | 0.0084±0.0010                | 3.7±1.2             | 0.011    |
|                | Ni-Ni (Fe) -2 <sup>nd</sup> | 4.2 ±0.5 | 3.47±0.02 | 0.0109±0.0281                |                     |          |
| <b>Fe edge</b> | Fe-O                        | 3.2±0.9  | 2.00±0.03 | 0.0114±0.0062                | -0.95±2.93          | 0.005    |
|                | Fe-Fe (Ni)                  | 5.6 ±0.8 | 2.52±0.01 | 0.0062±0.0011                | -3.65±1.44          |          |

Table S7. Estimated H<sub>2</sub>O production rate from hydrogen and oxygen balance in the plasma-catalytic system (mmol/min).

| Catalyst                                             | Ni1Fe1-R | Ni2Fe1-R | Ni3Fe1-R | Ni4Fe1-R | Ni1Fe0-R | Plasma |
|------------------------------------------------------|----------|----------|----------|----------|----------|--------|
| <b>H<sub>2</sub>O amount determined by H balance</b> | 0.184    | 0.179    | 0.168    | 0.158    | 0.185    | 0.202  |
| <b>H<sub>2</sub>O amount determined by O balance</b> | 0.056    | 0.067    | 0.069    | 0.074    | 0.060    | 0.049  |

Table S8. *In situ* FTIR bands of the surface adsorbed species on the LDH-derived Ni-Fe/(Mg, Al)O<sub>x</sub> catalysts during the plasma-catalytic CRT reaction at 35 °C and 1 bar.

| Wavenumber/cm <sup>-1</sup> | Assignment                                                            | Surface species                  | Reference |
|-----------------------------|-----------------------------------------------------------------------|----------------------------------|-----------|
| 3730, 3630                  | $\nu(\text{O-H})$ vibration                                           | bicarbonate ( $^*\text{HCO}_3$ ) | [4, 5]    |
| 3700, 3600                  | CO <sub>2</sub> overtones                                             | gas-phase CO <sub>2</sub>        | [4, 6]    |
| 2362, 2339                  | stretching vibration of C-O bonds                                     |                                  |           |
| 3262, 3267                  | vibration bands of C <sub>2</sub> H <sub>2</sub>                      | C <sub>2</sub> H <sub>2</sub>    | [7]       |
| 3015, 1305                  | $\nu(\text{C-H})$ stretching vibrations of CH <sub>4</sub>            | gas-phase methane                | [6, 8]    |
| 2172, 2119                  | stretching vibrations of C-O bonds                                    | gas-phase CO                     | [6, 9]    |
| 1718, 1506                  | $\nu(\text{C=O})$ stretching vibrations of unsaturated aliphatic acid | surface maleate species          | [10, 11]  |
| 1697, 1646                  | $\nu(\text{C=O})$ stretching vibration                                | benzaldehyde species             | [12]      |
| 1605                        | asymmetric stretching vibration of COO <sup>-</sup>                   | formate species                  | [13]      |
| 1540, 1342                  | asymmetric and symmetric stretching vibration of COO <sup>-</sup>     | benzoate species                 | [12-14]   |
| 1268                        | C-O stretching vibration                                              |                                  |           |
| 1458                        | bending vibration of C-OH                                             |                                  |           |
| 1352                        | CH <sub>2</sub> deformation vibration of benzyl species               | benzyl alcoholate                | [12-14]   |
| 1245                        | C-O stretching vibration                                              |                                  |           |
| 949                         | $\nu(\text{C=C})$ vibration                                           | short-chain olefin               | [10]      |
| 3075, 3037                  | $\nu(\text{C-H})$ stretching vibration of aromatic ring               | aromatic ring                    | [15, 16]  |
| 1612, 1499, 1459            | skeleton $\nu(\text{C=C})$ vibration of aromatic ring                 |                                  |           |
| 1075, 1030                  | in-plane $\nu(\text{C-H})$ bending of aromatic ring                   |                                  |           |
| 2937, 2881                  | symmetric or asymmetric $\nu(\text{C-H})$ stretching of methylene     | methylene (-CH <sub>2</sub> )    | [17]      |
| 1420                        | bending vibration of methylene                                        |                                  |           |
| 1041                        | C-O vibration band                                                    | benzoyl oxide species            | [18]      |

## References

- [1] K. Zhang, G. Zhang, X. Liu, A.N. Phan, K. Luo, A study on CO<sub>2</sub> decomposition to CO and O<sub>2</sub> by the combination of catalysis and dielectric-barrier discharges at low temperatures and ambient pressure, *Industrial & Engineering Chemistry Research*, 56 (2017) 3204-3216.
- [2] K. Xiao, X. Li, J. Santoso, H. Wang, K. Zhang, J. Wu, D. Zhang, Synergistic effect of dielectric barrier discharge plasma and Mn catalyst on CO<sub>2</sub> reforming of toluene, *Fuel*, 285 (2021) 119057.
- [3] F. Zhu, H. Zhang, H. Yang, J. Yan, X. Li, X. Tu, Plasma reforming of tar model compound in a rotating gliding arc reactor: Understanding the effects of CO<sub>2</sub> and H<sub>2</sub>O addition, *Fuel*, 259 (2020) 116271.
- [4] L. Proaño, E. Tello, M.A. Arellano-Trevino, S. Wang, R.J. Farrauto, M. Cobo, In-situ DRIFTS study of two-step CO<sub>2</sub> capture and catalytic methanation over Ru, "Na<sub>2</sub>O"/Al<sub>2</sub>O<sub>3</sub> dual functional material, *Applied Surface Science*, 479 (2019) 25-30.
- [5] Z. Tang, W. He, Y. Wang, Y. Wei, X. Yu, J. Xiong, X. Wang, X. Zhang, Z. Zhao, J. Liu, Ternary heterojunction in rGO-coated Ag/Cu<sub>2</sub>O catalysts for boosting selective photocatalytic CO<sub>2</sub> reduction into CH<sub>4</sub>, *Applied Catalysis B: Environmental*, 311 (2022) 121371.
- [6] C. Cerdá-Moreno, A. Chica, S. Keller, C. Rautenberg, U. Bentrup, Ni-sepiolite and Ni-todorokite as efficient CO<sub>2</sub> methanation catalysts: Mechanistic insight by operando DRIFTS, *Applied Catalysis B: Environmental*, 264 (2020) 118546.
- [7] R. Vakili, R. Gholami, C.E. Stere, S. Chansai, H. Chen, S.M. Holmes, Y. Jiao, C. Hardacre, X. Fan, Plasma-assisted catalytic dry reforming of methane (DRM) over metal-organic frameworks (MOFs)-based catalysts, *Applied Catalysis B: Environmental*, 260 (2020) 118195.
- [8] H.L. Huynh, J. Zhu, G. Zhang, Y. Shen, W.M. Tucho, Y. Ding, Z. Yu, Promoting effect of Fe on supported Ni catalysts in CO<sub>2</sub> methanation by in situ DRIFTS and DFT study, *Journal of Catalysis*, 392 (2020) 266-277.
- [9] S. Das, S. Bhattar, L. Liu, Z. Wang, S. Xi, J.J. Spivey, S. Kawi, Effect of partial Fe substitution in La<sub>0.9</sub>Sr<sub>0.1</sub>NiO<sub>3</sub> perovskite-derived catalysts on the reaction mechanism of methane dry reforming, *ACS Catalysis*, 10 (2020) 12466-12486.
- [10] Y. Sun, J. Han, K. Xu, K. Wu, W. Wu, X. Zhang, B. Jiang, Probing the effects of plasma-induced surface species in ring-opening process of toluene decomposition via plasma-excited TPD and in situ DRIFTS, *Journal of Cleaner Production*, 371 (2022) 133332.
- [11] X. Zhang, F. Bi, Z. Zhu, Y. Yang, S. Zhao, J. Chen, X. Lv, Y. Wang, J. Xu, N. Liu, The promoting effect of H<sub>2</sub>O on rod-like MnCeO<sub>x</sub> derived from MOFs for toluene oxidation: A combined experimental and theoretical investigation, *Applied Catalysis B: Environmental*, 297 (2021) 120393.
- [12] L. Zhang, Y. Liu, X. Fang, Y. Cheng, Regulating oxygen species for promoted deep oxidation of toluene: A comparative study of adsorbed oxygen and lattice oxygen, *Fuel*, 321 (2022) 124116.
- [13] Z. Wu, D. Zhu, Z. Chen, S. Yao, J. Li, E. Gao, W. Wang, Enhanced energy efficiency and reduced nanoparticle emission on plasma catalytic oxidation of toluene using

Au/ $\gamma$ -Al<sub>2</sub>O<sub>3</sub> nanocatalyst, Chemical Engineering Journal, 427 (2022) 130983.

[14] J. Li, H. Na, X. Zeng, T. Zhu, Z. Liu, In situ DRIFTS investigation for the oxidation of toluene by ozone over Mn/HZSM-5, Ag/HZSM-5 and Mn–Ag/HZSM-5 catalysts, Applied Surface Science, 311 (2014) 690-696.

[15] S. Mo, Q. Zhang, J. Li, Y. Sun, Q. Ren, S. Zou, Q. Zhang, J. Lu, M. Fu, D. Mo, J. Wu, H. Huang, D. Ye, Highly efficient mesoporous MnO<sub>2</sub> catalysts for the total toluene oxidation: Oxygen-Vacancy defect engineering and involved intermediates using in situ DRIFTS, Applied Catalysis B: Environmental, 264 (2020) 118464.

[16] B. Jiang, K. Xu, J. Li, H. Lu, X. Fei, X. Yao, S. Yao, Z. Wu, Effect of supports on plasma catalytic decomposition of toluene using in situ plasma DRIFTS, Journal of Hazardous Materials, 405 (2021) 124203.

[17] H. Sun, Z. Liu, S. Chen, X. Quan, The role of lattice oxygen on the activity and selectivity of the OMS-2 catalyst for the total oxidation of toluene, Chemical Engineering Journal, 270 (2015) 58-65.

[18] V. Augugliaro, H. Kisch, V. Loddo, M.J. López-Muñoz, C. Márquez-Álvarez, G. Palmisano, L. Palmisano, F. Parrino, S. Yurdakal, Photocatalytic oxidation of aromatic alcohols to aldehydes in aqueous suspension of home prepared titanium dioxide: 2. Intrinsic and surface features of catalysts, Applied Catalysis A: General, 349 (2008) 189-197.
